# Supplementary material for: Six-coordinated nickel(ii) complexes with benzothiadiazole Schiff-base ligands: synthesis, crystal structure, magnetic and HFEPR study
Source: Royal Society of Chemistry journal article supplement (doi:10.1039/d4dt01143k), 2024-01-01
Supplement: d4dt01143k1.pdf [file d4dt01143k1.pdf]

**Supporting information for**

**Six-coordinated nickel(II) complexes with benzothiadiazole Schiff-base ligands: synthesis, crystal structure, magnetic and HFEPR study**

Nataliya Plyuta,<sup>a</sup> Anne-Laure Barra,<sup>b</sup> Ghenadie Novitchi<sup>b</sup> and Narcis Avarvari<sup>\*a</sup>

<sup>a</sup> *Univ Angers, CNRS, MOLTECH-Anjou, SFR MATRIX, F-49000 Angers, France. E-mail: narcis.avarvari@univ-angers.fr*

<sup>b</sup> *Laboratoire National des Champs Magnétiques Intenses, UPR CNRS 3228, Université Grenoble-Alpes, B.P. 166, 38042 Grenoble Cedex 9, France*

**Table S1.** Shape measures calculation for six-coordinated nickel (II) ion of **1** and **2** obtained using SHAPE.

| Structure [NiL <sub>6</sub> ]                                                 | Hexagon (D <sub>6h</sub> ) | Pentagonal pyramid (C <sub>5v</sub> ) | Octahedron (O <sub>h</sub> ) | Trigonal prism (D <sub>3h</sub> ) | Johnson pentagonal pyramid J2 (C <sub>5v</sub> ) |
|-------------------------------------------------------------------------------|----------------------------|---------------------------------------|------------------------------|-----------------------------------|--------------------------------------------------|
| Ni(L <sup>1</sup> ) <sub>2</sub> ( <b>1</b> )                                 | 31.110                     | 25.415                                | 0.880                        | 12.280                            | 28.919                                           |
| Ni(L <sup>2</sup> ) <sub>2</sub> CH <sub>2</sub> Cl <sub>2</sub> ( <b>2</b> ) | 32.414                     | 25.994                                | 0.605                        | 12.949                            | 29.711                                           |

**Table S2.** Selected bond distances (Å) and angles (°) for **1**.

|                                            |            |                                            |            |
|--------------------------------------------|------------|--------------------------------------------|------------|
| N(1)-Ni(1)                                 | 2.2207(16) | N(1) <sup>i</sup> -Ni(1)                   | 2.2207(16) |
| N(3)-Ni(1)                                 | 2.0587(15) | N(3) <sup>i</sup> -Ni(1)                   | 2.0587(15) |
| Ni(1)-O(1)                                 | 1.9977(13) | Ni(1)-O(1) <sup>i</sup>                    | 1.9977(13) |
| O(1)-Ni(1)-O(1) <sup>i</sup>               | 97.64(8)   | O(1) <sup>i</sup> -Ni(1)-N(1)              | 168.05(5)  |
| O(1)-Ni(1)-N(3) <sup>i</sup>               | 90.14(6)   | N(3) <sup>i</sup> -Ni(1)-N(1)              | 97.87(6)   |
| O(1) <sup>i</sup> -Ni(1)-N(3) <sup>i</sup> | 92.28(6)   | N(3)-Ni(1)-N(1)                            | 79.42(6)   |
| O(1)-Ni(1)-N(3)                            | 92.28(6)   | O(1)-Ni(1)-N(1) <sup>i</sup>               | 168.05(5)  |
| O(1) <sup>i</sup> -Ni(1)-N(3)              | 90.14(6)   | O(1) <sup>i</sup> -Ni(1)-N(1) <sup>i</sup> | 88.66(6)   |
| N(3) <sup>i</sup> -Ni(1)-N(3)              | 176.32(8)  | N(3) <sup>i</sup> -Ni(1)-N(1) <sup>i</sup> | 79.42(6)   |
| O(1)-Ni(1)-N(1)                            | 88.66(6)   | N(3)-Ni(1)-N(1) <sup>i</sup>               | 97.88(6)   |
| N(1)-Ni(1)-N(1) <sup>i</sup>               | 87.04(8)   |                                            |            |

Symmetry code:  $i = -x+1, y, -z+1/2$ .**Table S3.** Selected bond distances (Å) and angles (°) for **2**.

|                 |            |                 |            |
|-----------------|------------|-----------------|------------|
| N(6)-Ni(1)      | 2.052(4)   | N(2)-Ni(1)      | 2.159(5)   |
| O(1)-Ni(1)      | 1.997(4)   | N(3)-Ni(1)      | 2.060(4)   |
| O(3)-Ni(1)      | 2.010(3)   | N(5)-Ni(1)      | 2.181(4)   |
| O(1)-Ni(1)-N(2) | 170.94(16) | O(1)-Ni(1)-O(3) | 95.89(16)  |
| O(3)-Ni(1)-N(2) | 87.69(16)  | O(1)-Ni(1)-N(6) | 98.18(17)  |
| N(6)-Ni(1)-N(2) | 90.10(18)  | O(3)-Ni(1)-N(6) | 90.41(16)  |
| N(3)-Ni(1)-N(2) | 80.97(18)  | O(1)-Ni(1)-N(3) | 90.30(17)  |
| O(1)-Ni(1)-N(5) | 87.64(16)  | O(3)-Ni(1)-N(3) | 97.33(16)  |
| O(3)-Ni(1)-N(5) | 170.35(16) | N(6)-Ni(1)-N(3) | 167.90(17) |
| N(6)-Ni(1)-N(5) | 80.19(16)  | N(2)-Ni(1)-N(5) | 90.16(17)  |
| N(3)-Ni(1)-N(5) | 91.62(16)  |                 |            |

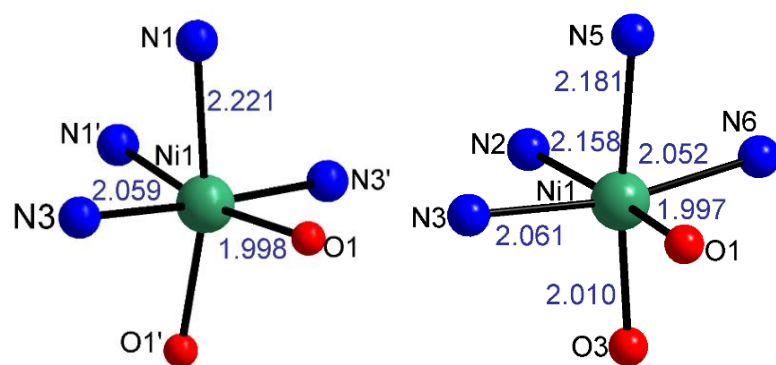

**Fig. S1** The coordination environment of nickel(II) ion in complex **1** (left) and **2** (right).

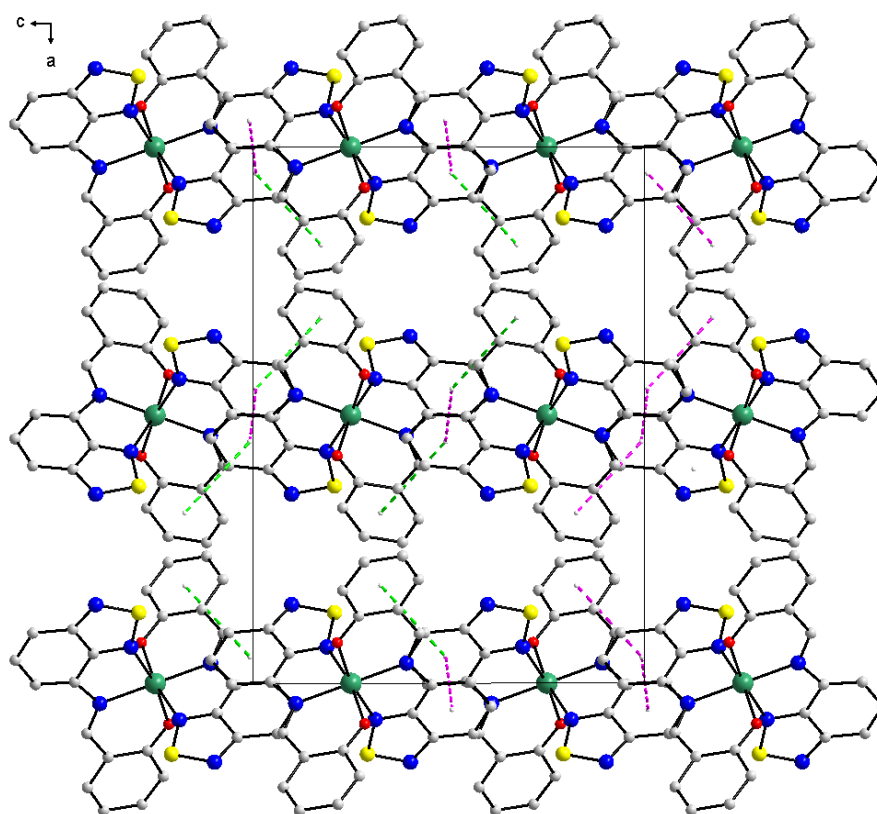

**Fig. S2** Crystal packing of complex **1** along the *b* axis showing the  $\pi$ - $\pi$  stacking interactions.

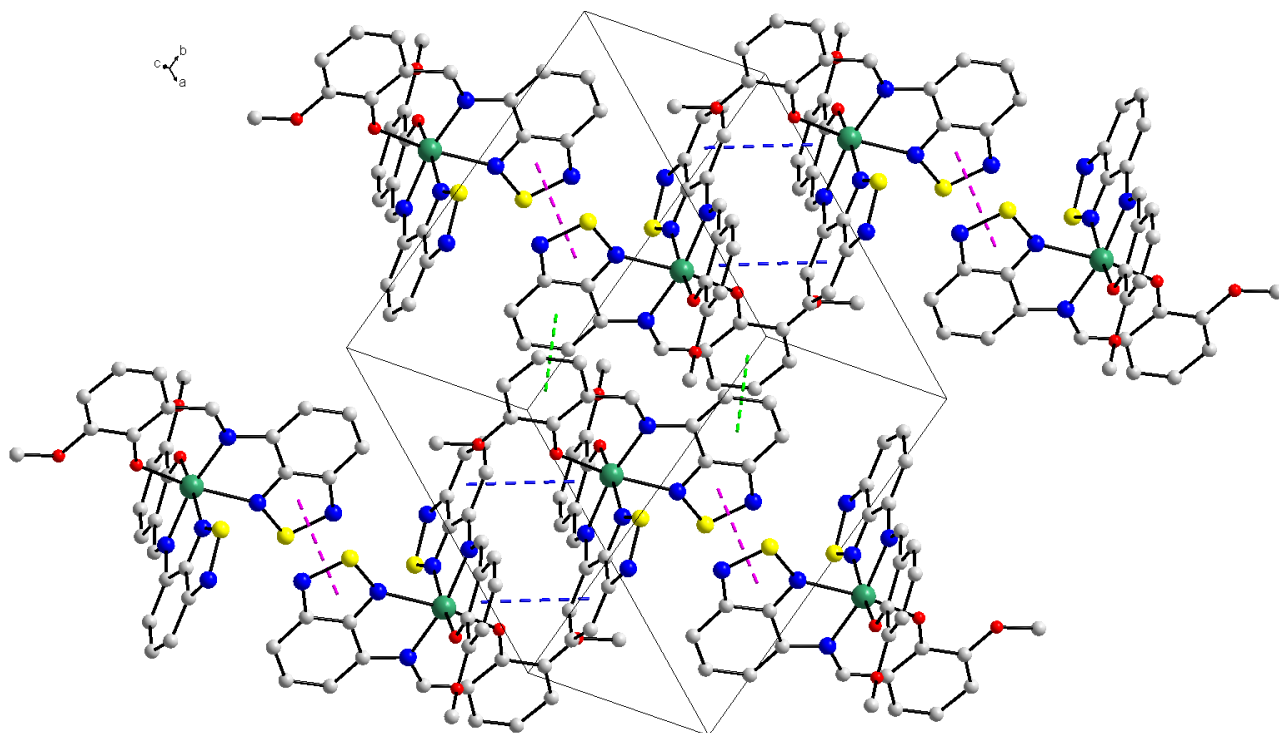

**Fig. S3** Crystal structure of complex **2** showing  $\pi$ - $\pi$  stacking interactions (solvent molecules are omitted for clarity).

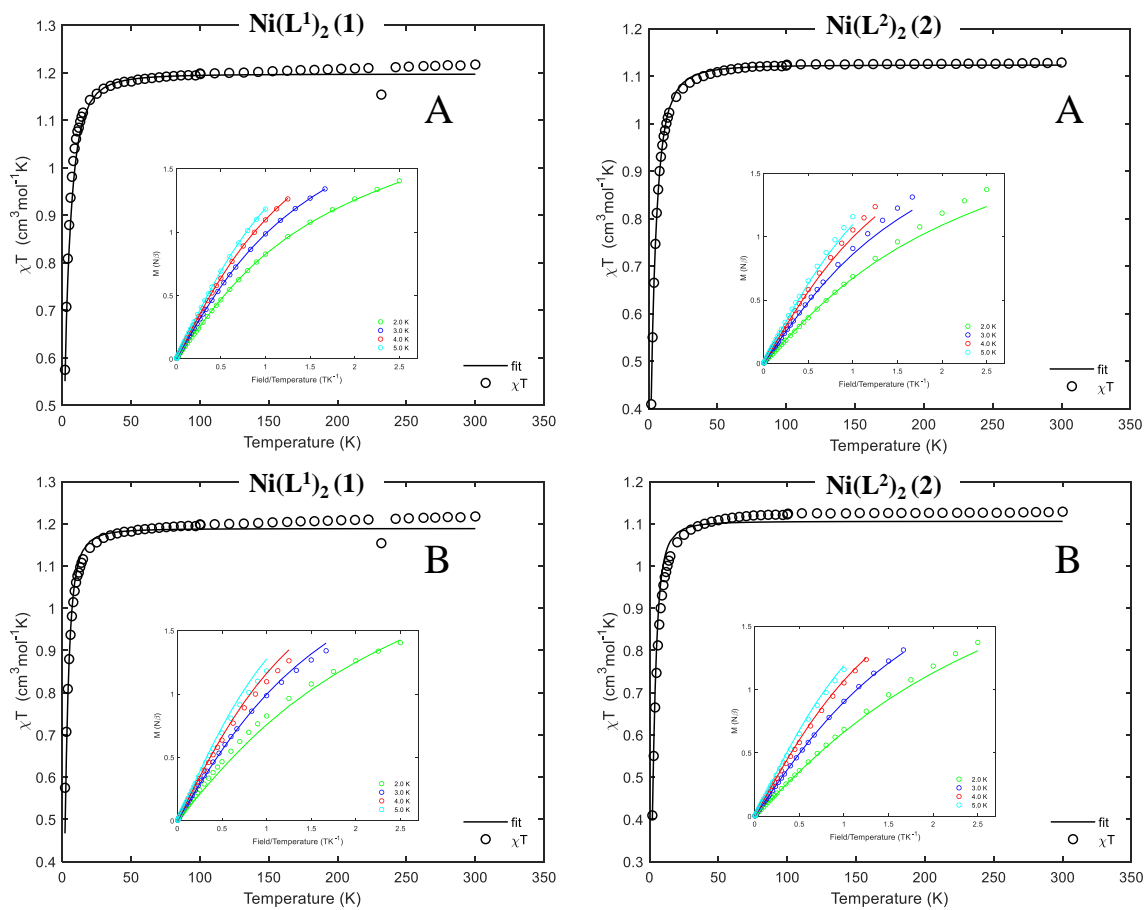

**Fig. S4** Fits of Magnetic susceptibility (0.1 T) and magnetization at indicated temperatures for compounds **1** and **2** under conditions where  $D < 0$  (A) and  $D > 0$  (B).

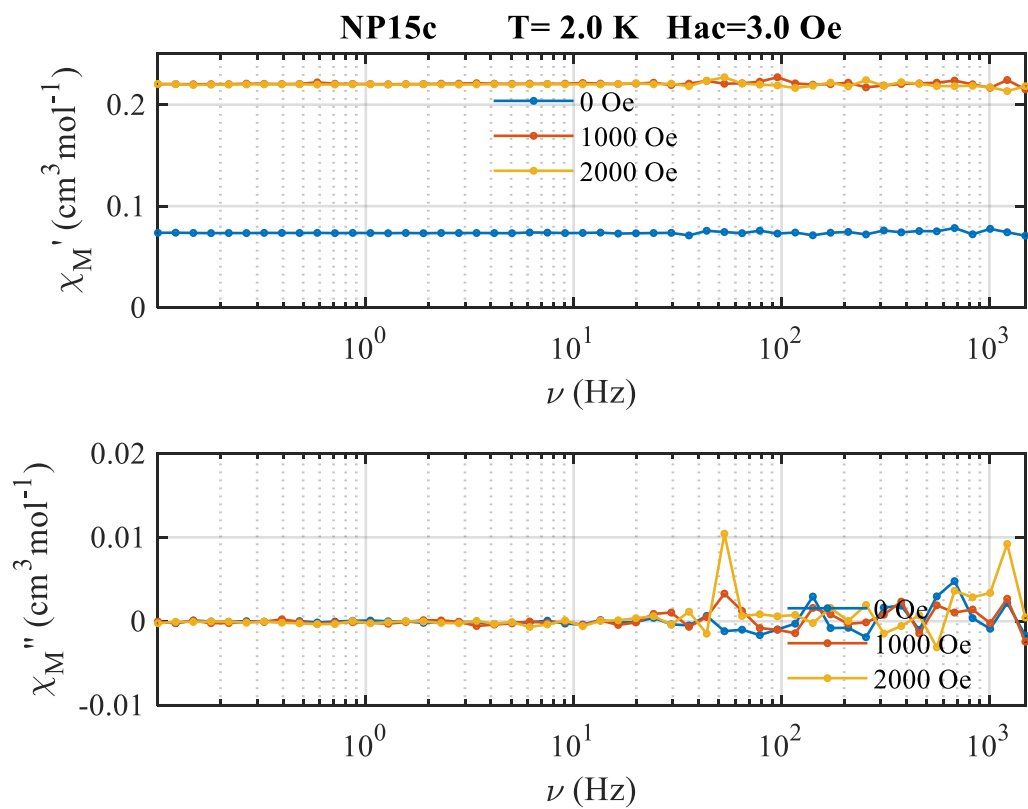

**Fig. S5** The *ac* susceptibility ( $H_{ac}=3.0$  Oe) for sample **2** at 0, 1000 and 2000 Oe.

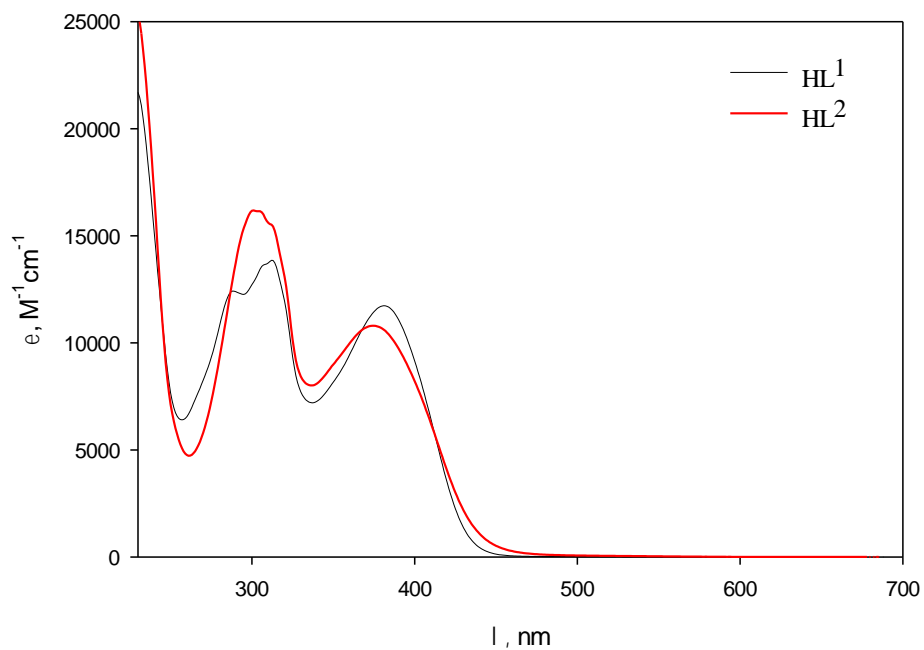

**Fig. S6** UV-Vis spectra of the ligands HL<sup>1</sup> and HL<sup>2</sup> in dichloromethane ( $C = 5 \times 10^{-5}$  M, room temperature).

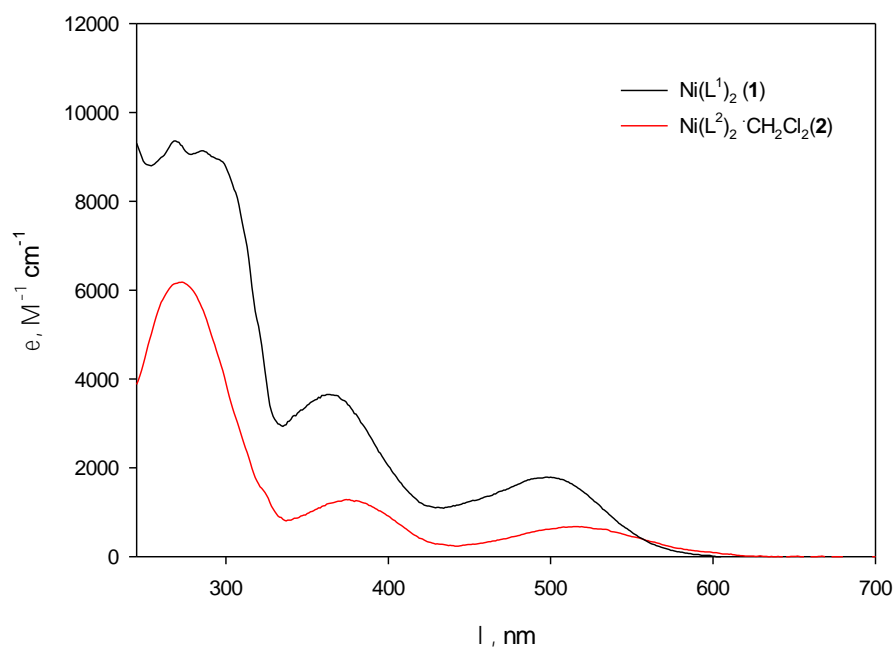

**Fig. S7** UV-Vis spectra of complexes **1** and **2** in acetonitrile ( $C = 1.5 \times 10^{-5}$  M, room temperature).

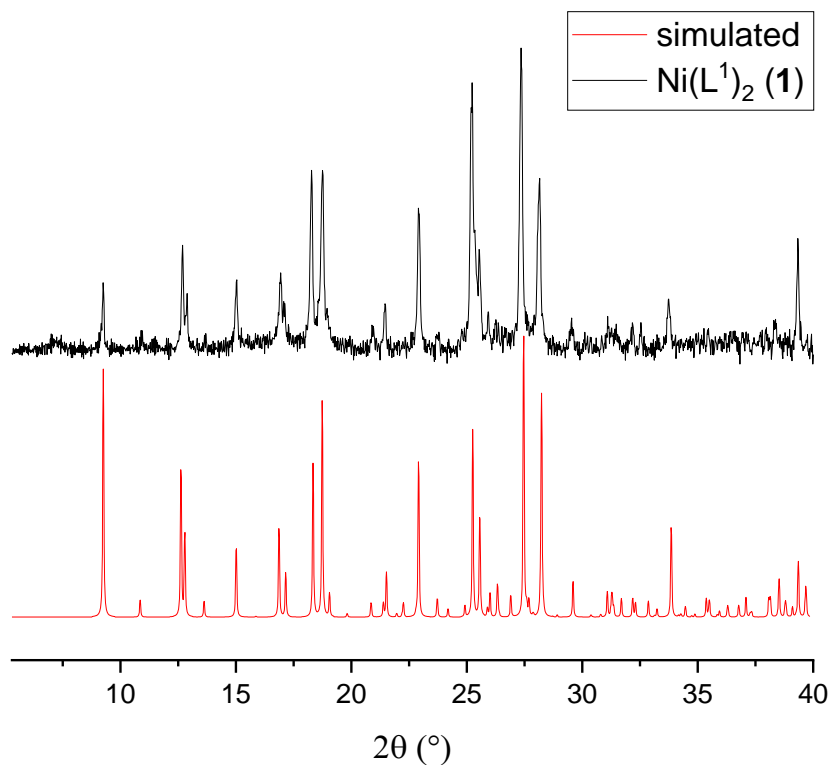

**Fig. S8** Experimental powder X-ray diffraction (PXR) diffractogram of complex **1** (top) and the simulated one from single crystal data (bottom).

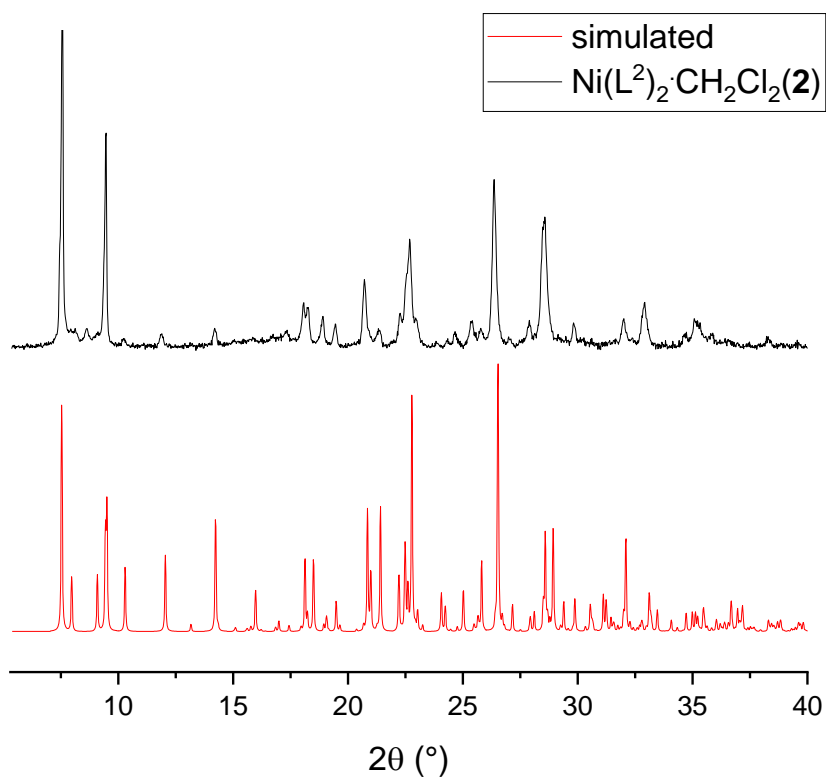

**Fig. S9** Experimental powder X-ray diffraction (PXR) diffractogram of complex **2** (top) and the simulated one from single crystal data (bottom).
